# Supplementary material
Source: Royal Society of Chemistry journal article supplement (doi:10.1039/d5ja00479a)
Supplement: d5ja00479a1.pdf [file d5ja00479a1.pdf]

# Comparative Study of Nanosecond Laser Wavelengths for Improved LIBS Analysis of Soft Tissues

Hana Kopřivová<sup>a</sup>, Vojtěch Fedra<sup>a</sup>, Jakub Buday<sup>a,b</sup>, Daniel Holub<sup>c,d</sup>, Petr Šperka<sup>b</sup>, Lucie Vrlíková<sup>a,e</sup>, Marcela Buchtová<sup>e</sup>, Pavel Pořízka<sup>a,b</sup>, and Jozef Kaiser<sup>a,b</sup>

<sup>a</sup> Central European Institute of Technology (CEITEC), Brno University of Technology, Purkyňova 123, 612 00 Brno, Czech Republic

<sup>b</sup> Faculty of Mechanical Engineering (FME), Brno University of Technology, Technická 2 896, 616 69 Brno, Czech Republic

<sup>c</sup> Luxembourg Institute of Science and Technology, 5 Avenue des Hauts-Fourneaux, L-4362, Esch-sur-Alzette, Luxembourg

<sup>d</sup> European Space Resources Innovation Centre, 5 Avenue des Hauts-Fourneaux, L-4362, Esch-sur-Alzette, Luxembourg

<sup>e</sup> Laboratory of Molecular Morphogenesis, Institute of Animal Physiology and Genetics, Czech Academy of Sciences, Veveří 97, 60200 Brno, Czech Republic

Corresponding author: Jakub Buday, [Jakub.Buday@ceitec.vutbr.cz](mailto:Jakub.Buday@ceitec.vutbr.cz)

## Supplementary

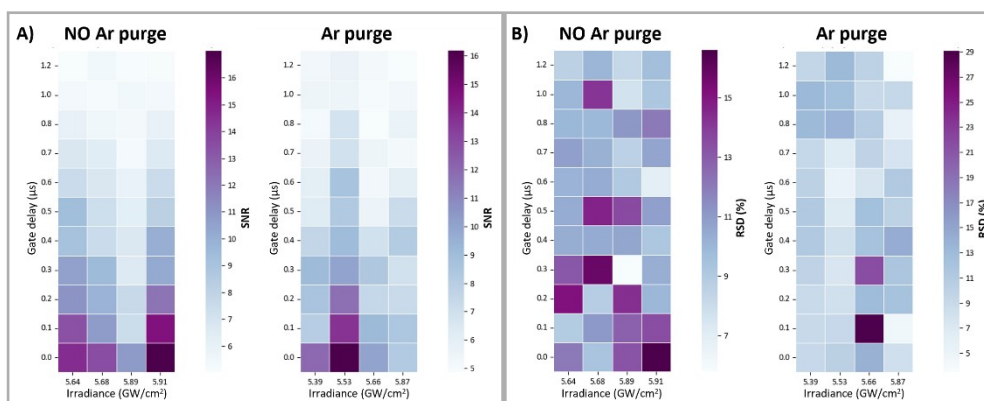

Figure S1: Heat maps of A) SNR and B) RSD analysis for Ca II 393 nm without/with Ar purge for 266 nm laser wavelength.

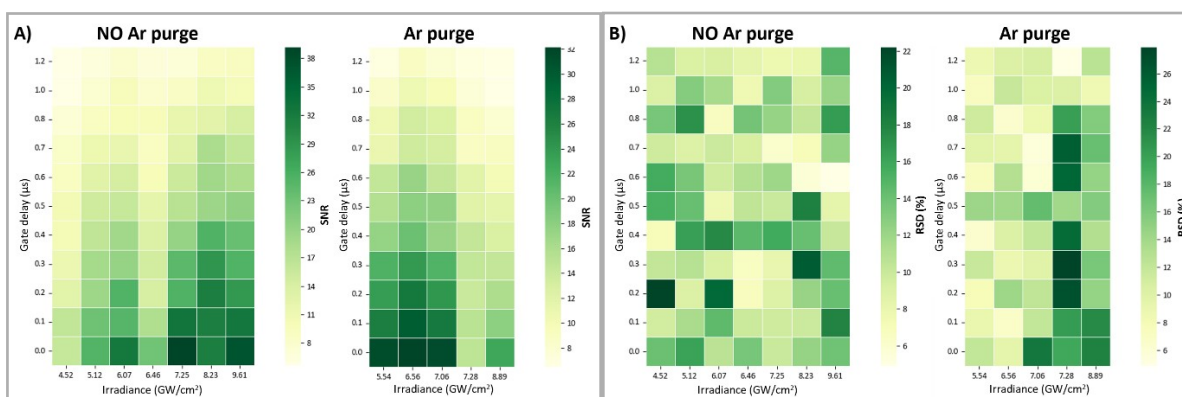

Figure S2: Heat maps of A) SNR and B) RSD analysis for Ca II 393 nm without/with Ar purge for 532 nm laser wavelength.

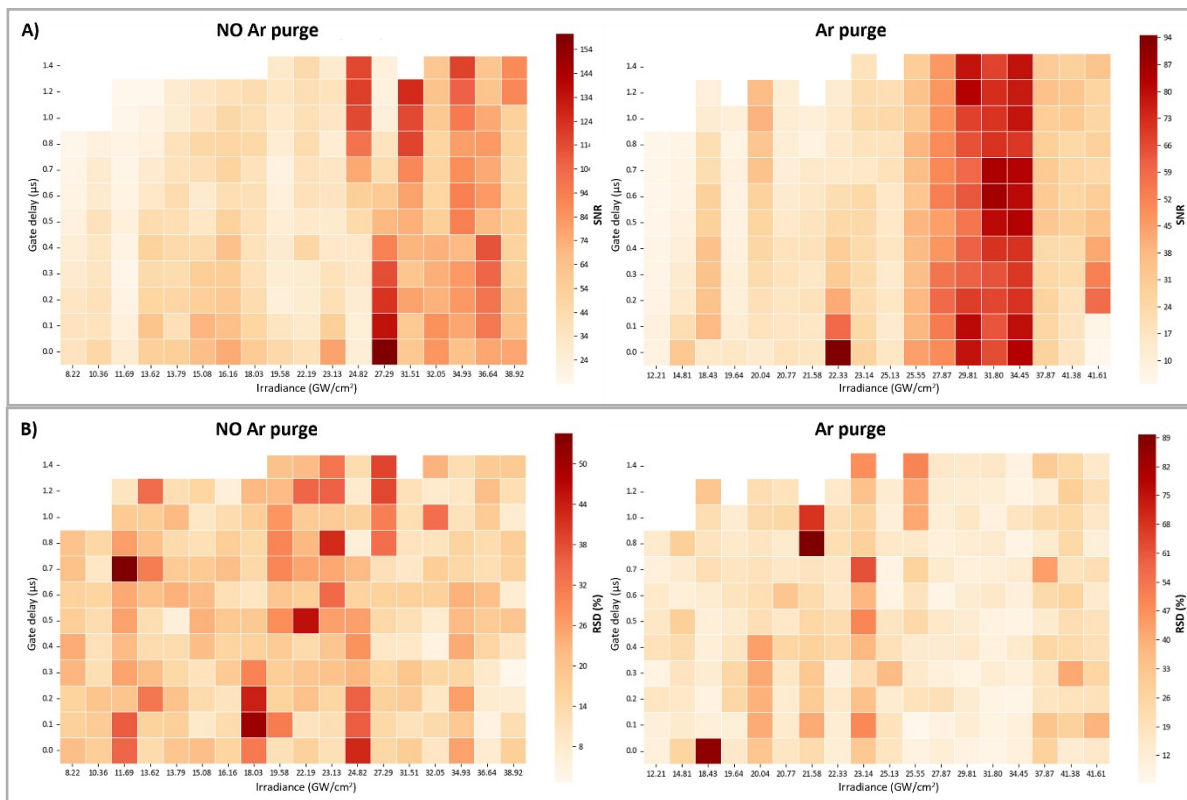

Figure S3: Heat maps of A) SNR and B) RSD analysis for Ca II 393 nm without/with Ar purge for 1064 nm laser wavelength.
